# Supplementary material for: Mycobacterium tuberculosis PhoP integrates stress response to intracellular survival by regulating cAMP level
Source: eLife journal article supplement (doi:10.7554/elife.92136), 2024-01-11
Supplement: fig3-data4 [file elife-92136-fig3-data4-v1.xls]

## Sheet: Fig. 3D
						Relative mRNA levels of genes in indicated knock-down mutants of M. tuberculosis
			Cт Mean	dct					dct	ddct	power				Cт Mean	dct					ct mean	dct	ddct	power	stdev	error	average power
	pdeC	phop	25.5665	20.7357		pdesg2	phop	25.5525	20.6314	-0.104331	1.075		pdeC	phop	22.7626	18.1531		pdesg2	phop	23.6432	24.4562	19.5018	1.34863	0.392664	0.482481	0.241241	0.73383
	pdeC	phop	25.5665	20.7357		pdesg2	phop	25.5525	20.6314	-0.104331	1.075		pdeC	phop	22.7626	18.1531		pdesg2	phop	25.2693	24.4562	19.5018	1.34863	0.392664	0.482481	0.241241	0.73383
	pdeC	pde	34.1087	29.2779		pdesg2	pde	36.7123	31.7911	2.51318	0.175169		pdeC	pde	31.4942	26.8848		pdesg2	pde	37.6631	37.1157	32.1612	5.27644	0.0258009	0.105619	0.0528094	0.100485
	pdeC	pde	34.1087	29.2779		pdesg2	pde	36.7123	31.7911	2.51318	0.175169		pdeC	pde	31.4942	26.8848		pdesg2	pde	36.5682	37.1157	32.1612	5.27644	0.0258009	0.105619	0.0528094	0.100485
	pdeC	16SrRNA	4.8308	0		pdesg2	16SrRNA	4.92114	0	0	1		pdeC	16SrRNA	4.60942	0		pdesg2	16SrRNA	4.58508	4.95447	0	0	1	0	0	1
	pdeC	16SrRNA	4.8308	0		pdesg2	16SrRNA	4.92114	0	0	1		pdeC	16SrRNA	4.60942	0		pdesg2	16SrRNA	5.32387	4.95447	0	0	1	0	0	1
											rv0805
												phop	pde										pde	Phop	16SrRNA
											1	1.075	0.175169									Atc -	1	1	1
											1	0.392664	0.0258009									Atc +	0.100485	0.73383	1
											p value	0.51696	0.00682297
			Cт Mean	dct					dct	ddct	power					dct				dct	ddct	power	stdev	sterror	average power
	phoC	phop	21.1525	16.3568		phop KD	phop	23.5343	17.9899	1.63305	0.322406		phopC	phop	24.3858	19.9539	phopsg2	phop	27.069	21.8983	1.94438	0.259827	0.0442503	0.0221252	0.291117
	phoC	phop	21.1525	16.3568		phop KD	phop	23.5343	17.9899	1.63305	0.322406		phopC	phop	24.3858	19.9539	phopsg2	phop	27.069	21.8983	1.94438	0.259827	0.0442503	0.0221252	0.291117
	phoC	pde	29.2594	24.4637		phop KD	pde	27.7772	22.2328	-2.23094	4.6944		phopC	pde	34.1778	29.7458	phopsg2	pde	32.9939	27.8231	-1.92271	3.79134	0.638566	0.319283	4.24287
	phoC	pde	29.2594	24.4637		phop KD	pde	27.7772	22.2328	-2.23094	4.6944		phopC	pde	34.1778	29.7458	phopsg2	pde	32.9939	27.8231	-1.92271	3.79134	0.638566	0.319283	4.24287
	phoC	16S	4.7957	0		phop KD	16S	5.54448	0	0	1		phopC	16SrRNA	4.43192	0	phopsg2	16SrRNA	5.17076	0	0	1	0	0	1
	phoC	16S	4.7957	0		phop KD	16S	5.54448	0	0	1		phopC	16SrRNA	4.43192	0	phopsg2	16SrRNA	5.17076	0	0	1	0	0	1
																								Phop	pde	16SrRNA
																							Atc -	1	1	1
											phop-KD		phop	pde									Atc +	0.157314	4.24287	1
												1	0.0548017	4.6944
												1	0.259827	3.79134
												p value
													0.0144781	0.0188413

## Sheet: Final plot
		pde	Phop	16SrRNA	pde	Phop	16SrRNA
	Atc -	1	1	1	1	1	1
	Atc +	0.100485	0.73383	1	4.24287	0.157314	1			0.0528094
										0.241241
										0
										0.967622
										0.0724873
										0
