# Supplementary material for: Mycobacterium tuberculosis PhoP integrates stress response to intracellular survival by regulating cAMP level
Source: eLife journal article supplement (doi:10.7554/elife.92136), 2024-01-11
Supplement: fig4-data1 [file elife-92136-fig4-data1-v1.xlsx]

## Sheet: Fig 4A
															Growth curves of indicated strains under normal and acidic pH
																															ST100 7	ST100 7						Rv pde 7	Rv pde 7
																							Rv 7	Rv 7	ave	stdev	se				0.15	0.17	0.16	0.01	0.005			0.154	0.214	0.184	0.03	0.015
																						0	0.17	0.15	0.16	0.01	0.005				0.306	0.368	0.337	0.031	0.0155			0.328	0.385	0.3565	0.0285	0.01425
																						1	0.402	0.398	0.4	0.002	0.001				0.618	0.64	0.629	0.011	0.0055			0.764	0.7	0.732	0.032	0.016
																						2	0.728	0.753	0.7405	0.0125	0.00625				1.23	0.98	1.105	0.125	0.0625			1.5	1.3	1.4	0.1	0.05
																						3	1.25	1.1	1.175	0.075	0.0375				2.108	1.9	2.004	0.104	0.052			3.23	2.2	2.715	0.515	0.2575
		pvalue		Rv 7	Rv 4.5	ST100 7	ST100 4.5	Rv pde 7	Rvpde 4.5	RvpdeM 7	RvpdeM 4.5											6	2.2	2.24	2.22	0.02	0.01				2.7	2.8	2.75	0.05	0.025			3.6	3.2	3.4	0.2	0.1
																						9	3.22	3.3	3.26	0.04	0.02				3.4	3.8	3.6	0.2	0.1			4.05	4.4	4.225	0.175	0.0875
			0	0.17	0.144	0.15	0.155	0.154	0.149	0.2167	0.2171											12	4.167	4.1	4.1335	0.0335	0.01675				ST100 4.5	ST100 4.5						Rvpde 4.5	Rvpde 4.5
			1	0.402	0.27	0.306	0.188	0.328	0.188	0.4185	0.2735												Rv 4.5	Rv 4.5							0.155	0.13	0.1425	0.0125	0.00625			0.149	0.1352	0.1421	0.0069	0.00345
			2	0.728	0.336	0.618	0.204	0.764	0.207	0.7395	0.3485											0	0.144	0.16	0.152	0.008	0.004				0.188	0.196	0.192	0.004	0.002			0.188	0.194	0.191	0.003	0.0015
			3	1.25	0.4	1.23	0.245	1.5	0.25	1.121	0.3725											1	0.27	0.29	0.28	0.01	0.005				0.204	0.21	0.207	0.003	0.0015			0.207	0.22	0.2135	0.0065	0.00325
			6	2.2	0.54	2.108	0.257	3.23	0.259	2.225	0.5045											2	0.336	0.36	0.348	0.012	0.006				0.245	0.3	0.2725	0.0275	0.01375			0.25	0.27	0.26	0.01	0.005
			9	3.22	0.72	2.7	0.28	3.6	0.27	3.1635	0.615											3	0.4	0.418	0.409	0.009	0.0045				0.257	0.356	0.3065	0.0495	0.02475			0.259	0.32	0.2895	0.0305	0.01525
			12	4.167	0.8	3.4	0.335	4.05	0.29	4.7505	0.708											6	0.54	0.5	0.52	0.02	0.01				0.28	0.4	0.34	0.06	0.03			0.27	0.39	0.33	0.06	0.03
																						9	0.72	0.69	0.705	0.015	0.0075				0.335	0.46	0.3975	0.0625	0.03125			0.29	0.43	0.36	0.07	0.035
																						12	0.8	0.785	0.7925	0.0075	0.00375
			SE	0.005	0.004	0.005	0.00625	0.015	0.00345	0.00665	0.00205
				0.001	0.005	0.0155	0.002	0.01425	0.0015	0.01325	0.0129047												RvpdeM 7	RvpdeM 7
				0.00625	0.006	0.0055	0.0015	0.016	0.00325	0.02975	0.0178544											0	0.2034	0.23	0.2167	0.0133	0.00665
				0.0375	0.0045	0.0625	0.01375	0.05	0.005	0.0545	0.00972272											1	0.392	0.445	0.4185	0.0265	0.01325
				0.01	0.01	0.052	0.02475	0.2575	0.01525	0.0225	0.00194454											2	0.68	0.799	0.7395	0.0595	0.02975
				0.02	0.0075	0.025	0.03	0.1	0.03	0.07675	0.0137886											3	1.012	1.23	1.121	0.109	0.0545
				0.01675	0.00375	0.1	0.03125	0.0875	0.035	0.02525	0.00282843											6	2.18	2.27	2.225	0.045	0.0225
																						9	3.317	3.01	3.1635	0.1535	0.07675
																						12	4.7	4.801	4.7505	0.0505	0.02525
																								RvpdeM 4.5
																						0	0.2212	0.213	0.2171	0.0041	0.00205
																						1	0.31	0.237	0.2735	0.0258094	0.0129047
																						2	0.399	0.298	0.3485	0.0357089	0.0178544
																						3	0.4	0.345	0.3725	0.0194454	0.00972272
																						6	0.51	0.499	0.5045	0.00388909	0.00194454
																						9	0.654	0.576	0.615	0.0275772	0.0137886
																						12	0.7	0.716	0.708	0.00565685	0.00282843
