# Supplementary material for: Mycobacterium tuberculosis PhoP integrates stress response to intracellular survival by regulating cAMP level
Source: eLife. 2024 May 13;13:RP92136. doi: 10.7554/eLife.92136 (PMC11090507; doi:10.7554/eLife.92136)
Supplement: Figure 1—figure supplement 1—source data 1. [file elife-92136-fig1-figsupp1-data1.xlsx]

## Sheet: Figure supplemental 1
											CFU of indicated mycobacterial strains under normal and stress conditions
							Normal
							Set1	set2	AVERAGE	STDev	SE
			WT-H37Rv			H37Rv	80000000	4.84667e+07	6.42333e+07	2.22974e+07	1.11487e+07
			phoP mutant			ST100	8.33333e+07	44000000	6.36667e+07	2.78129e+07	1.39064e+07
			compl. phoP mutant			ST117	8.26667e+07	3.28e+07	5.77333e+07	3.52611e+07	1.76305e+07
							NO
			WT-H37Rv			H37Rv	2.89333e+07	5.33333e+07	4.11333e+07	1.72534e+07	8.6267e+06
			phoP mutant			ST100	2.94667e+07	52600000	4.10333e+07	1.63577e+07	8.17887e+06
			compl. phoP mutant			ST117	2.66667e+07	5.13333e+07	39000000	1.7442e+07	8.72098e+06
							Acid
			WT-H37Rv			H37Rv	26000000	3.90667e+07	3.25333e+07	9.23953e+06	4.61976e+06
			phoP mutant			ST100	3.10667e+07	4.06667e+07	3.58667e+07	6.78823e+06	3.39411e+06
			compl. phoP mutant			ST117	6.98667e+07	3.86667e+07	5.42667e+07	2.20617e+07	1.10309e+07
							SE
							Normal condition	NO stress	Acid stress
			WT-H37Rv			H37Rv	1.11487e+07	8.6267e+06	4.61976e+06
			phoP mutant			ST100	1.39064e+07	8.17887e+06	3.39411e+06
			compl. phoP mutant			ST117	1.76305e+07	8.72098e+06	1.10309e+07
							Normal condition	NO stress	Acid stress
			WT-H37Rv			H37Rv	6.42333e+07	4.11333e+07	3.25333e+07
			phoP mutant			ST100	6.36667e+07	4.10333e+07	3.58667e+07
			compl. phoP mutant			ST117	5.77333e+07	39000000	5.42667e+07
