# Supplementary material for: Mycobacterium tuberculosis PhoP integrates stress response to intracellular survival by regulating cAMP level
Source: eLife. 2024 May 13;13:RP92136. doi: 10.7554/eLife.92136 (PMC11090507; doi:10.7554/eLife.92136)
Supplement: Figure 1—source data 1. [file elife-92136-fig1-data1.xlsx]

## Sheet: Fig 1A
				cAMP estimation in WT, phoPR-KO and the complemented mutant
		NS	NO	PH4.5			NS	NO	PH4.5
												NS	NO	PH4.5
	RV	32.9797	46.3541	45.7591		ST100	26.3563	6.47667	10.047		ST117	54.0434	149.886	23.3811
		18.5332	77.8119	37.6599			9.67796	15.0215	16.9727			68.0442	116.248	41.4066
	no.of cells= 45x 10^8	0.732882	1.03009	1.01687			0.585696	0.143926	0.223267			1.20096	3.33079	0.51958
		0.411848	1.72915	0.836887			0.215066	0.33381	0.377172			1.51209	2.58329	0.920147
	set1	732.882	1030.09	1016.87			585.696	143.926	223.267			1200.96	3330.79	519.58
	set2	411.848	1729.15	836.887			215.066	333.81	377.172			1512.09	2583.29	920.147
	ave	572.365	1379.62	926.878			400.381	238.868	300.219			1356.53	2957.04	719.864
	stv	160.517	349.532	89.9915			185.315	94.9421	76.9528			155.564	373.75	200.283
	se	80.2586	174.766	44.9958			92.6575	47.471	38.4764			77.7822	186.875	100.142
	p value	0.00685874	0.0162003	0.0228493
		**	**	*
	p value RvN and Rv acid			0.0129365	**
		RvN and Rv NO		0.111292	NS
		NS	NO	PH4.5		SE
	RV	572.365	1379.62	926.878		40.03	174.766	88.1608
	ST100	400.381	238.868	300.219		92.6575	47.471	38.4764
	ST117	1356.53	2957.04	719.864		77.7822	186.875	100.142
