# Supplementary material for: Mycobacterium tuberculosis PhoP integrates stress response to intracellular survival by regulating cAMP level
Source: eLife. 2024 May 13;13:RP92136. doi: 10.7554/eLife.92136 (PMC11090507; doi:10.7554/eLife.92136)
Supplement: Figure 1—source data 2. [file elife-92136-fig1-data2.xlsx]

## Sheet: Fig. 1B
								Quantification of cAMP secretion of WT, phoPR-KO and the complemented mutant
		Conc. In nmol							Concentrations in nmol / 10^8 cells
					Set1	set2	set3		Set1	set2	set3	avg	Stdev	SE	p value
		WT-H37Rv CF	Rv CF		39.2824	54.6343	65.057		6.54707	9.10571	10.8428	8.83187	2.16094	1.08047	0.393132
		phoP mutant CF			27.5109	47.8627	52.7408		4.58514	7.97711	8.79014	7.11746	2.23041	1.11521
		phoP mutant compl CF			46.4475	50.5698	58.4147		7.74125	8.4283	9.73578	8.63511	1.01322	0.50661
		CF=culture filtrate
									Equal no. of cells were taken ie.6 x10^8 for all Mtb strain in sautons media for secretion studies.
			Concentrations in nmol / 10^8 cells
	Culture filtrate (CF)			WT-H37Rv			8.83187
	Culture filtrate (CF)			phoP mutant			7.11746
	Culture filtrate (CF)			phoP mutant complemented			8.63511
