# Supplementary material for: Mycobacterium tuberculosis PhoP integrates stress response to intracellular survival by regulating cAMP level
Source: eLife. 2024 May 13;13:RP92136. doi: 10.7554/eLife.92136 (PMC11090507; doi:10.7554/eLife.92136)
Supplement: Figure 2—source data 1. [file elife-92136-fig2-data1.xls]

## Sheet: Sheet1
													Relative mRNA levels of genes in WT, phoPR mutant and the complemented mutant
													Set1	Set 2
													Rv0891C	Rv0891C	ave	stdev	se	pvalue
												H37Rv	1	1	1	0	0
												phoP mutant	0.135205	0.374457	0.254831	0.169177	0.0845883
												comp. phoP mutant	0.0121896	0.0442807	0.0282352	0.0226919	0.0113459	0.0248163
													Set1	Set 2
													Rv1247	Rv1247	ave		se
												H37Rv	1	1	1	0	0
												phoP mutant	0.524473	1.06924	0.796854	0.385206	0.192603
												comp. phoP mutant	0.713106	2.45732	1.58521	1.23334	0.616672	0.533524
													Set 1	Set 2
													Rv1647	Rv1647	ave		se
												H37Rv	1	1	1	0	0
												phoP mutant	0.971689	0.705421	0.838555	0.188279	0.0941397	0.349063
												comp. phoP mutant	0.480043	1.73091	1.10547	0.884493	0.442247					RV 1339
													Set 1	Set 2								1
													Rv2488C	Rv2488C	ave		se					0.601947
												H37Rv	1	1	1	0	0					0.194331
												phoP mutant	0.272866	0.60716	0.440013	0.236382	0.118191
												comp. phoP mutant	0.407212	0.504756	0.455984	0.0689735	0.0344867	0.0787167		AVG	Rv0386	Rv0891C	Rv1247	Rv 1625c	Rv1647	Rv2488C	Rv0805	RV 1339	Rv1357c	Rv2837c
																				H37Rv	1	1	1	1	1	1	1	1	1	1
												Set 1	Set 2	Set 3						phoP mutant	1.48869	0.254831	0.796854	0.787254	0.838555	0.440013	8.94709	0.775387	0.59618	1.26063
												rv0805	Rv0805	Rv0805	ave		se			comp. phoP mutant	0.917487	0.0282352	1.58521	0.409635	1.10547	0.455984	3.86093	0.221458	1.01533	0.868148
											H37Rv	1	1	1	1	0	0
											phoP mutant	12.0064	5.16666	9.66818	8.94709	3.47643	1.73821	0.0166853
											comp. phoP mutant	5.73116	1.99069		3.86093	2.64491	1.32246
																				SE	Rv0386	Rv0891C	Rv1247	Rv 1625c	Rv1647	Rv2488C	Rv0805	RV 1339	Rv1357c	Rv2837c
													Set 1	Set 2						H37Rv	0	0	0	0	0	0	0	0	0	0
													Rv1357c	Rv1357c	ave		se	p value		phoP mutant	0.24594	0.0845883	0.192603	0.202672	0.0941397	0.118191	1.73821	0.3078	0.32303	0.250879
												WT-H37Rv	1	1	1	0	0			comp. phoP mutant	0.0748002	0.0113459	0.616672	0.165788	0.442247	0.0344867	1.32246	0.0245808	0.210592	0.248813
												phoP mutant	1.05301	0.139346	0.59618	0.646061	0.32303	0.469971
												compl. phoP mutant	1.31315	0.717503	1.01533	0.421184	0.210592
																				p value (Wt and comp mut)	0.132467
													Set 1	Set 2
													Rv2837c	Rv2837c	ave		se	p value
												H37Rv	1	1	1	0	0
												phoP mutant	1.61543	0.905834	1.26063	0.501759	0.250879	0.539042
												comp. phoP mutant	0.516274	1.22002	0.868148	0.497625	0.248813
												Set 1	Set 2	Set 3
												Rv0386	Rv0386	Rv0386	ave		se	p value
											H37Rv	1	1	1	1	0	0
											phoP mutant	1.75259	1.70455	1.00893	1.48869	0.49188	0.24594	0.277008
											comp. phoP mutant	1.67878	0.642623	0.431057	0.917487	0.1496	0.0748002
												Set 1	Set 2	Set 3	ave	stdev	se	p value
												Rv 1625c	Rv 1625c	Rv 1625c
											H37Rv	1	1	1	1	0	0
											phoP mutant	0.779537	0.486191	1.28736	0.787254	0.405343	0.202672	0.55902
											comp. phoP mutant	0.282579	0.160378	0.785949	0.409635	0.331575	0.165788
												Set 1	Set 2	Set 3	ave	stdev	se	p value
												Rv 1339	Rv 1339	Rv 1339
											H37Rv	1	1	1	1	0	0
											phoP mutant	0.649323	0.232578	1.44426	0.775387	0.615599	0.3078	0.561724
											comp. phoP mutant	0.25622	0.186695		0.221458	0.0491617	0.0245808
