# Supplementary material for: Mycobacterium tuberculosis PhoP integrates stress response to intracellular survival by regulating cAMP level
Source: eLife. 2024 May 13;13:RP92136. doi: 10.7554/eLife.92136 (PMC11090507; doi:10.7554/eLife.92136)
Supplement: Figure 2—source data 2. [file elife-92136-fig2-data2.xlsx]

## Sheet: Sheet 1
					Relative mRNA levels of indicated genes under normal and acidic conditions
		Set1	Set2	Set3	Average	stdev	sterror	p value			Error bar
		Rv0805	Rv0805	Rv0805							0.100303
	Rv N (normal conditions)	1	1	1	1	0	0				0.125042
	Rv A (acidic pH)	0.195999	0.494049	0.112426	0.267491	0.200605	0.100303	0.0240998			0
								*			0
		Set1	Set2	Set3	Average	stdev
		16S rRNA	16S rRNA	16S rRNA
	Rv N (normal conditions)	1	1	1	1	0	0
	Rv A (acidic pH)	1	1	1	1	0	0			Rv0805	Rv1339	16S rRNA
									H37Rv N	1	1	1
		Set1	Set2	Average	stdev	sterror	p value		H37RvA	0.221631	0.80772	1
		Rv1339	Rv1339
	Rv N (normal conditions)	1	1	1	0	0
	Rv A (acidic pH)	0.630884	0.984556	0.80772	0.250084	0.125042	0.390474
				Rv N means WT-H37Rv grown under normal pH 7.0
				Rv A means WT-H37Rv grown under acidic pH 4.50
