# Supplementary material for: Mycobacterium tuberculosis PhoP integrates stress response to intracellular survival by regulating cAMP level
Source: eLife. 2024 May 13;13:RP92136. doi: 10.7554/eLife.92136 (PMC11090507; doi:10.7554/eLife.92136)
Supplement: Figure 2—source data 3. [file elife-92136-fig2-data3.xlsx]

## Sheet: Fig 2C
								Relative enrichment of anti-PhoP ChIP within target promoters
			pde N	pde A	msl3 N	msl3 A	16S
		p value	1.1999	1.93267	6.37674	2.78608	1
			1.86666	2.20948	1.74277	4.59947	1
			1.53328	2.07108	2.76877	3.69278	1
					3.62943
			0.0411288
	stdev		0.47147	0.195735	2.43392	1.28226	0
			0.235735	1.21696	0
			0.0978675	0.641128	0
				Rv Normal	Rv Acid
			pde	1.53328	2.07108
			msl3	3.62943	3.69278
			16 SrRNA	1	1
			pde Normal	pde Acid	16 SrRNA
		Rv Normal	0.0998286	2.07108	1
		error bar	0.235735	0.0978675	1
		msl3 error	1.21696	0.641128
		16 S	0	0
		Normal error
		0.235735	0	1.21696
		0.0399118	0	0.641128
