# Supplementary material for: Mycobacterium tuberculosis PhoP integrates stress response to intracellular survival by regulating cAMP level
Source: eLife. 2024 May 13;13:RP92136. doi: 10.7554/eLife.92136 (PMC11090507; doi:10.7554/eLife.92136)
Supplement: Figure 3—figure supplement 1—source data 1. [file elife-92136-fig3-figsupp1-data1.xlsx]

## Sheet: Fig. S3A
								Relative mRNA levels of genes in indicated mycobacterial strains
														SE	0.579827	0.209037	0.0747491
															0.585098	0.128131	0.111592
											pde				Avg
										Rv	1	1	1	1	1
										RvPDE		6.95052	5.75602	4.63157	5.77937	1.15965	0.579827
										Mpde			5.5139	3.859	4.68645	1.1702	0.585098
										rv2387			Avg
									Rv	1	1	1
									RvPDE	0.607418	0.543399	0.322475	0.491098	0.149498	0.0747491
									Mpde		0.653527	0.337898	0.495712	0.223183	0.111592
												rv1357
									Rv	1	1	1	1
									RvPDE	0.950146	0.944384	0.223157	0.705896	0.418074	0.209037
									Mpde		0.627964	0.990372	0.809168	0.256261	0.128131
											Rv0805	Rv1357	Rv2387
									pvalue	Rv	1	1	1
									0.00207007	Rv-pde	5.77937	0.705896	0.491098
									0.0163823	Rv-pdeM	4.68645	0.809168	0.495712
