# Supplementary material for: Mycobacterium tuberculosis PhoP integrates stress response to intracellular survival by regulating cAMP level
Source: eLife. 2024 May 13;13:RP92136. doi: 10.7554/eLife.92136 (PMC11090507; doi:10.7554/eLife.92136)
Supplement: Figure 3—figure supplement 1—source data 2. [file elife-92136-fig3-figsupp1-data2.xlsx]

## Sheet: Fig. S3B
							CFU enumeration of indicated mycobacterial strains
			24 hr. Normal				Avg	volume plated=50ul	dilution=5
	SET1		Rv	100	99	40	79.6667	1.59333	1.59333e+08
			ST100	97	9	56	54	1.08	108000000
			PDE	95	77	58	76.6667	1.53333	1.53333e+08
			pdeM	42	107	54	67.6667	1.35333	1.35333e+08
	Set2		Rv	150	127	100	125.667	2.51333	2.51333e+08
			ST100	140	190	89	139.667	2.79333	2.79333e+08
			PDE	99	160	78	112.333	2.24667	2.24667e+08
			pdeM	115	109	170	131.333	2.62667	2.62667e+08
	Set3		Rv	89	100	79	89.3333	1.78667	1.78667e+08
			ST100	60	57	102	73	1.46	146000000
			PDE	75	78	90	81	1.62	162000000
			pdeM	63	87	95	81.6667	1.63333	1.63333e+08
			24 hr. Normal	Set1	Set2	Set3	Avg	STDev	SE
			Rv	1.59333e+08	2.51333e+08	1.78667e+08	1.96444e+08	4.85081e+07	2.42541e+07
			ST100	108000000	2.79333e+08	146000000	1.77778e+08	8.99786e+07	4.49893e+07
			PDE	1.53333e+08	2.24667e+08	162000000	180000000	3.89244e+07	1.94622e+07
			pdeM	1.35333e+08	2.62667e+08	1.63333e+08	1.87111e+08	6.6914e+07	3.3457e+07
				Rv	1.96444e+08
				ST100	1.77778e+08
				PDE	180000000
				pdeM	1.87111e+08
		Rv stands for WT-H37Rv
		ST100 stands for phoP mutant of H37Rv
		PDE stands for WT-H37Rv expressing Rv0805 (PDE)
		pdeM stands for WT-H37Rv expressing mutant Rv0805
			24 hr. Normal			SE
			Rv	1.96444e+08		1.98034e+07
			ST100	1.77778e+08		3.67336e+07
			PDE	180000000		1.58908e+07
			pdeM	1.87111e+08		2.73175e+07
