# Supplementary material for: Mycobacterium tuberculosis PhoP integrates stress response to intracellular survival by regulating cAMP level
Source: eLife. 2024 May 13;13:RP92136. doi: 10.7554/eLife.92136 (PMC11090507; doi:10.7554/eLife.92136)
Supplement: Figure 3—source data 1. [file elife-92136-fig3-data1.xlsx]

## Sheet: Figure 3A
				Relative mRNA levels of genes in indicated strains under normal and acidic pH
		Set1	Set2	Average	stdev	sterror	p value		St:PhoP A
		Rv0805	Rv0805						error
	ST:PhoP N	1	1	1	0	0	0.992184		0.194117
	ST:PhoP A	1.27115	0.722107	0.996629	0.388233	0.194117			0.140963
									0
		Set1	Set2	Average	stdev	sterror	p value
		Rv1339	Rv1339	Rv1339
	ST:PhoP N	1	1	1	0	0	0.959361
	ST:PhoP A	1.2121	0.813391	1.01274	0.281927	0.140963		ST:PhoP	phoPR mutant expressing phoP alone
								N means under normal conditions pH 7.0
								A means under acidic pH conditions pH 4.5
		Rv0805	Rv1339	16S rRNA
	ST:PhoP N	1	1	1
	St:PhoP A	0.996629	1.01274	1
															Ave
