# Supplementary material for: Mycobacterium tuberculosis PhoP integrates stress response to intracellular survival by regulating cAMP level
Source: eLife. 2024 May 13;13:RP92136. doi: 10.7554/eLife.92136 (PMC11090507; doi:10.7554/eLife.92136)
Supplement: Figure 3—source data 2. [file elife-92136-fig3-data2.xlsx]

## Sheet: Figure 3B
				Relative mRNA levels of genes in indicated strains under normal and acidic pH
											error ST117 A
		Set1	Set2	Average	stdev	sterror	p value				0.0107443
		Rv0805	Rv0805								0.158
	ST117 N	1	1	1	0	0	0.0105818				0
	ST117 A	0.0707439	0.101133	0.0859387	0.0214886	0.0107443	**
								N means under normal conditions pH 7.0
		Set1	Set2	Average	stdev	sterror	p value	A means under acidic pH conditions pH 4.5
		Rv1339	Rv1339	Rv1339
	ST117 N	1	1	1	0	0	0.714684
	ST117 A	0.883988	1.33088	1.10743	0.315999	0.158		ST117	phoPR mutant expressing both phoP and phoR
			Rv0805	Rv1339	16S rRNA
		ST117 N	1	1	1
		ST117 A	0.0859387	1.10743	1
															Ave
