# Supplementary material for: Mycobacterium tuberculosis PhoP integrates stress response to intracellular survival by regulating cAMP level
Source: eLife. 2024 May 13;13:RP92136. doi: 10.7554/eLife.92136 (PMC11090507; doi:10.7554/eLife.92136)
Supplement: Figure 3—source data 3. [file elife-92136-fig3-data3.xlsx]

## Sheet: Fig. 3C
				Intrabacterial cAMP levels in indicated mycobacterial strains
					WT	ΔphoP	Rv: pde	Rv: pdeM
				Conc.
			SET1		16.8476	6.20138	8.88824
			SET2		17.9104	8.66344	10.6168	38.701
			SET3		19.5458	10.0004	6.80427	18.7044
				avg	18.1013	8.28842	8.76977	28.7027
				stdev	1.35916	1.92709	1.90902	14.1397			WT	ΔphoP	Rv: pde	Rv: pdeM
				SE	0.67958	0.963546	0.954512	7.06986			18.1013	8.28842	8.76977	28.7027
				p values	0.253437	0.00196452	0.00231725	0.0274842
						**	**	*
				p values (WT withRv::pdeM)	0.253437
				Rv::pde stands for WT-H37Rv expressing WT Rv0805
				Rv::pdeM stands for WT-H37Rv expressing mutant Rv0805
