# Supplementary material for: Mycobacterium tuberculosis PhoP integrates stress response to intracellular survival by regulating cAMP level
Source: eLife. 2024 May 13;13:RP92136. doi: 10.7554/eLife.92136 (PMC11090507; doi:10.7554/eLife.92136)
Supplement: Figure 3—source data 5. [file elife-92136-fig3-data5.xls]

## Sheet: Fig. 3E
								cAMP levels of indicated knock-down mutants
	1	2	3	4	5	6	7	8	9	10	11	12
A													540590
B													540590
C													540590
D													540590
E	863	835	851	977	1072	1045	677	875	3176	3602			540590
F	922	1325	995	1478	1741	2228	1825	2080	3330	3593			540590
G	283	363	466	938	1140	1752	2365	1775	3645	4			540590
H	129	190	312	559	717	1104	1274	1144	3305	4			540590
ave std	206	276.5	389	748.5	928.5	1428	1819.5	1459.5	3475
													conc.	log 10 0f conc.	flu
	892.5	1080	923	1227.5	1406.5	1636.5	1251	1477.5	3253	3597.5			100000	4	206
													100	2	276.5
		986.25	1075.25		1521.5	1364.25					986.25		30	1.47712	389
											1075.25		10	1	748.5
	set 1	892.5		1080							1521.5		3	0.477121	928.5
		923		1227.5							1364.25		1	0	1428
		1406.5		1636.5									0.3	-0.522879	1819.5
		1251		1477.5									0.003	-1.52288	1459.5
		set 1
			dil factor	anti log	interpolated values	florp read	stdev	sterror
		PhoP C	8.30824	4.15412	0.618479	892.5	0.169453	0.0847264					Final
		PhoP KD	7.56131	3.78066	0.577567	923	0.264484	0.132242					dil factor	anti log	interpolated values	florp read
		Pde C	1.9812	0.990598	-0.00410256	1406.5	0.193975	0.0969876				PhoP C	6.25798	3.12899	0.495405	986.25
		Pde KD	3.00035	1.50018	0.176143	1251	0.186075	0.0930377				PhoP KD	4.849	2.4245	0.384622	1075.25
												Pde C	1.45225	0.726127	-0.138988	1521.5
												Pde KD	2.2178	1.1089	0.0448925	1364.25
		set 2
			dil factor	anti log	interpolated values	florp read		p value phoP KD			p value pde kD
		PhoP C	4.78483	2.39242	0.378837	1080		8.30824	7.56131		1.9812	3.00035
		PhoP KD	3.19566	1.59783	0.203531	1227.5		4.78483	3.19566		1.05343	1.6369
		Pde C	1.05343	0.526714	-0.278425	1636.5		6.25798	4.849		1.45225	2.2178
		Pde KD	1.6369	0.81845	-0.0870077	1477.5		0.0395898			0.0246695

## Sheet: Final plot
					pde C	pde KD	phoP C	PhoP KD
				cAMP (nM)	1	1.52714	4.30916	3.33895
				no of cells	0.0222222	0.0339365	0.095759	0.0741989
					22.2222	33.9365	95.759	74.1989
0.0969876	0.140851
0.0930377	0.135114
0.0847264	0.123044
0.132242	0.192049
			phoP C	PhoP KD				pde C	pde KD	phoP C	PhoP KD
		cAMP (nM)	6.25798	4.849			cAMP (nmol)	1.45225	2.2178	6.25798	4.849
			9.08818	7.04198				1	1.52714	4.30916	3.33895
