# Supplementary material for: Mycobacterium tuberculosis PhoP integrates stress response to intracellular survival by regulating cAMP level
Source: eLife. 2024 May 13;13:RP92136. doi: 10.7554/eLife.92136 (PMC11090507; doi:10.7554/eLife.92136)
Supplement: Figure 4—figure supplement 1—source data 3. [file elife-92136-fig4-figsupp1-data3.xls]

## Sheet: Fig S4B
								Relative mRNA levels of specific genes in indicated mycobacterial strains
			pks2
			set1	set2	set3	avg	stdev	se
		Rv	1	1	1	1	0	0
		ST100	0.0438996	0.0531826	0.0779784	0.0583535	0.017618	0.00880901	pvalue Rv:St100	8.16296e-08	****
		Rv-PDE	0.887653	1.61289	1.24587	1.2488	0.362626	0.181313	pvalue Rvpde :RvMpde	0.144005	ns
		Rv-PDEm	0.564197	0.810855		0.687526	0.174413	0.0872066
			msl3
			set1	set2	set3
		Rv	1	1	1	1	0	0
		ST100	0.039745	0.025474	0.0575347	0.0409179	0.0160625	0.00803127	pvalue Rv:St100	5.24168e-08	****
		Rv-PDE	0.731182	0.394034	0.4887	0.537972	0.173891	0.0869453	pvalue Rvpde :RvMpde	0.0990887	ns
		Rv-PDEm	1.00035	0.790836		0.895594	0.14815	0.0740751
			lipF
			set1	set2	set3
		Rv	1	1	1	1	0	0
		ST100	0.130662	0.103252	0.190314	0.141409	0.0445153	0.0222576	pvalue Rv:St100	4.78862e-06	****
		Rv-PDE	0.873187	0.543513	0.917697	0.778132	0.204401	0.102201	pvalue Rvpde :RvMpde	0.0385269	*
		Rv-PDEm	1.46101	2.10538		1.7832	0.455638	0.227819
				Avg
				pks2	msl3	lipF
		Rv		1	1	1
		ST100		0.0583535	0.0409179	0.141409
		Rv-PDE		1.2488	0.537972	0.778132
		Rv-PDEm		0.687526	0.895594	1.7832
				pks2	msl3	lipF
		SE	Rv	0	0	0
			ST100	0.00880901	0.00803127	0.0222576
			Rv-PDE	0.181313	0.0869453	0.102201
			Rv-PDEm	0.0872066	0.0740751	0.227819
