# Supplementary material for: Mycobacterium tuberculosis PhoP integrates stress response to intracellular survival by regulating cAMP level
Source: eLife. 2024 May 13;13:RP92136. doi: 10.7554/eLife.92136 (PMC11090507; doi:10.7554/eLife.92136)
Supplement: Figure 4—source data 1. [file elife-92136-fig4-data1.xlsx]

## Sheet: Fig 4A
															Growth curves of indicated strains under normal and acidic pH
																															ST100 7	ST100 7						Rv pde 7	Rv pde 7
																							Rv 7	Rv 7	ave	stdev	se				0.15	0.17	0.16	0.01	0.005			0.154	0.214	0.184	0.03	0.015
																						0	0.17	0.15	0.16	0.01	0.005				0.306	0.368	0.337	0.031	0.0155			0.328	0.385	0.3565	0.0285	0.01425
																						1	0.402	0.398	0.4	0.002	0.001				0.618	0.64	0.629	0.011	0.0055			0.764	0.7	0.732	0.032	0.016
																						2	0.728	0.753	0.7405	0.0125	0.00625				1.23	0.98	1.105	0.125	0.0625			1.5	1.3	1.4	0.1	0.05
																						3	1.25	1.1	1.175	0.075	0.0375				2.108	1.9	2.004	0.104	0.052			3.23	2.2	2.715	0.515	0.2575
				Rv 7	Rv 4.5	ST100 7	ST100 4.5	Rv pde 7	Rvpde 4.5	RvpdeM 7	RvpdeM 4.5											6	2.2	2.24	2.22	0.02	0.01				2.7	2.8	2.75	0.05	0.025			3.6	3.2	3.4	0.2	0.1
																						9	3.22	3.3	3.26	0.04	0.02				3.4	3.8	3.6	0.2	0.1			4.05	4.4	4.225	0.175	0.0875
			0	0.16	0.152	0.16	0.1425	0.184	0.1421	0.2167	0.2171											12	4.167	4.1	4.1335	0.0335	0.01675				ST100 4.5	ST100 4.5						Rvpde 4.5	Rvpde 4.5				pvalue
			1	0.4	0.28	0.337	0.192	0.3565	0.191	0.4185	0.2735												Rv 4.5	Rv 4.5							0.155	0.13	0.1425	0.0125	0.00625			0.149	0.1352	0.1421	0.0069	0.00345	0.36882
			2	0.7405	0.348	0.629	0.207	0.732	0.2135	0.7395	0.3485											0	0.144	0.16	0.152	0.008	0.004				0.188	0.196	0.192	0.004	0.002			0.188	0.194	0.191	0.003	0.0015	0.00205567
			3	1.175	0.409	1.105	0.2725	1.4	0.26	1.121	0.3725											1	0.27	0.29	0.28	0.01	0.005				0.204	0.21	0.207	0.003	0.0015			0.207	0.22	0.2135	0.0065	0.00325	0.000556925
			6	2.22	0.52	2.004	0.3065	2.715	0.2895	2.225	0.5045											2	0.336	0.36	0.348	0.012	0.006				0.245	0.3	0.2725	0.0275	0.01375			0.25	0.27	0.26	0.01	0.005	1.5014e-05
			9	3.26	0.705	2.75	0.34	3.4	0.33	3.1635	0.615											3	0.4	0.418	0.409	0.009	0.0045				0.257	0.356	0.3065	0.0495	0.02475			0.259	0.32	0.2895	0.0305	0.01525	0.0156259
			12	4.1335	0.7925	3.6	0.3975	4.225	0.36	4.7505	0.708											6	0.54	0.5	0.52	0.02	0.01				0.28	0.4	0.34	0.06	0.03			0.27	0.39	0.33	0.06	0.03	0.0130725
																						9	0.72	0.69	0.705	0.015	0.0075				0.335	0.46	0.3975	0.0625	0.03125			0.29	0.43	0.36	0.07	0.035	0.0105343
																						12	0.8	0.785	0.7925	0.0075	0.00375
			SE	0.005	0.004	0.005	0.00625	0.015	0.00345	0.00665	0.00205
				0.001	0.005	0.0155	0.002	0.01425	0.0015	0.01325	0.0129047												RvpdeM 7	RvpdeM 7
				0.00625	0.006	0.0055	0.0015	0.016	0.00325	0.02975	0.0178544											0	0.2034	0.23	0.2167	0.0133	0.00665
				0.0375	0.0045	0.0625	0.01375	0.05	0.005	0.0545	0.00972272											1	0.392	0.445	0.4185	0.0265	0.01325
				0.01	0.01	0.052	0.02475	0.2575	0.01525	0.0225	0.00194454											2	0.68	0.799	0.7395	0.0595	0.02975
				0.02	0.0075	0.025	0.03	0.1	0.03	0.07675	0.0137886											3	1.012	1.23	1.121	0.109	0.0545
				0.01675	0.00375	0.1	0.03125	0.0875	0.035	0.02525	0.00282843											6	2.18	2.27	2.225	0.045	0.0225
																						9	3.317	3.01	3.1635	0.1535	0.07675
																						12	4.7	4.801	4.7505	0.0505	0.02525
																								RvpdeM 4.5
																						0	0.2212	0.213	0.2171	0.0041	0.00205
																						1	0.31	0.237	0.2735	0.0258094	0.0129047
																						2	0.399	0.298	0.3485	0.0357089	0.0178544
																						3	0.4	0.345	0.3725	0.0194454	0.00972272
																						6	0.51	0.499	0.5045	0.00388909	0.00194454
																						9	0.654	0.576	0.615	0.0275772	0.0137886
																						12	0.7	0.716	0.708	0.00565685	0.00282843
