# Supplementary material for: Mycobacterium tuberculosis PhoP integrates stress response to intracellular survival by regulating cAMP level
Source: eLife. 2024 May 13;13:RP92136. doi: 10.7554/eLife.92136 (PMC11090507; doi:10.7554/eLife.92136)
Supplement: Figure 4—source data 2. [file elife-92136-fig4-data2.xlsx]

## Sheet: Fig. 4B
																Relative flouresence intensity of indicated mycobacterial strains (Alamar Blue assays)
																					pde	st100	Rv	mpde
																				set1	10391.5	14115	56567.5	48912
															Strains	Fluorescence				set2	11488.5	15585	64676	55935
															H37Rv	56292.3				set3	7519.5	13549	47633.5	27771
															ST100	14416.3				avg	9799.83	14416.3	56292.3	44206
															H37Rv::pde	9799.83				stdev	2049.58	1050.92	8524.58	14659.9
															H37Rv::Mpde	52423.5				se	1024.79	525.458	4262.29	7329.95
																				pvalue	0.000780402	0.00107719		0.0157871
																					pde with Rv	St100 with Rv		pde with Mpde
																					***	***		**
																					H37Rv	ST100	H37Rv::pde	H37Rv::Mpde
																				se	4262.29	525.458	1024.79	7329.95
