# Supplementary material for: Mycobacterium tuberculosis PhoP integrates stress response to intracellular survival by regulating cAMP level
Source: eLife. 2024 May 13;13:RP92136. doi: 10.7554/eLife.92136 (PMC11090507; doi:10.7554/eLife.92136)
Supplement: Figure 4—source data 3. [file elife-92136-fig4-data3.xlsx]

## Sheet: Sheet1
											CFU of indicated strains under oxidative stress
		24 hr. Normal				Avg	volume plated=50ul	dilution=5								24 hr. CHP				Avg	volume plated=50ul
SET1		Rv	100	99	40	79.6667	1.59333	1.59333e+08							dilution 1	Rv	321	297	349	322.333	6.44667	64466.7
		ST100	97	9	56	54	1.08	108000000							dilution 1	ST100	67	88	70	75	1.5	15000
		PDE	95	77	58	76.6667	1.53333	1.53333e+08							dilution 1	PDE	71	68	75	71.3333	1.42667	14266.7
		pdeM	42	107	54	67.6667	1.35333	1.35333e+08							dilution 1	pdeM	260	200	216	225.333	4.50667	45066.7
Set2		Rv	150	127	100	125.667	2.51333	2.51333e+08							dilution2	Rv	45	30	35	36.6667	0.733333	73333.3
		ST100	140	190	89	139.667	2.79333	2.79333e+08							dilution 1	ST100	51	72	101	74.6667	1.49333	14933.3
		PDE	99	160	78	112.333	2.24667	2.24667e+08							dilution 1	PDE	65	68	75	69.3333	1.38667	13866.7
		pdeM	115	109	170	131.333	2.62667	2.62667e+08							dilution 1	pdeM	292	301	354	315.667	6.31333	63133.3
Set3		Rv	89	100	79	89.3333	1.78667	1.78667e+08							dilution 1	Rv	320	278	301	299.667	5.99333	59933.3
		ST100	60	57	102	73	1.46	146000000							dilution 1	ST100	45	50	58	51	1.02	10200
		PDE	75	78	90	81	1.62	162000000							dilution 1	PDE	65	74	35	58	1.16	11600
		pdeM	63	87	95	81.6667	1.63333	1.63333e+08							dilution 1	pdeM	250	211	197	219.333	4.38667	43866.7
		24 hr. Normal	Set1	Set2	Set3	Avg	STDev	SE
		Rv	1.59333e+08	2.51333e+08	1.78667e+08	1.96444e+08	3.96067e+07	1.98034e+07
		ST100	108000000	2.79333e+08	146000000	1.77778e+08	7.34672e+07	3.67336e+07
		PDE	1.53333e+08	2.24667e+08	162000000	180000000	3.17817e+07	1.58908e+07		24 hr. Normal	Avg	STDev	SE
		pdeM	1.35333e+08	2.62667e+08	1.63333e+08	1.87111e+08	5.4635e+07	2.73175e+07		Rv	1.96444e+08	3.96067e+07	1.98034e+07
										ST100	1.77778e+08	7.34672e+07	3.67336e+07
		24 hr. CHP								PDE	180000000	3.17817e+07	1.58908e+07
		Rv	64466.7	73333.3	59933.3	65911.1	5565.06	2782.53		pdeM	1.87111e+08	5.4635e+07	2.73175e+07
		ST100	15000	14933.3	10200	13377.8	2247.19	1123.6
		PDE	14266.7	13866.7	11600	13244.4	1174.21	587.104
		pdeM	45066.7	63133.3	43866.7	50688.9	8813.18	4406.59
		24 hr. Normal			pvalues
		PDE	180000000		0.00013512		1.58908e+07
		ST100	1.77778e+08				3.67336e+07
		Rv	1.96444e+08		0.000216066		1.98034e+07
		pdeM	1.87111e+08		0.00295707		2.73175e+07		24 hr. CHP	Avg	STDev	SE
									Rv	65911.1	5565.06	2782.53
		24 hr. CHP							ST100	13377.8	2247.19	1123.6
		PDE	13244.4				587.104		PDE	13244.4	1174.21	587.104
		ST100	13377.8				1123.6		pdeM	50688.9	8813.18	4406.59
		Rv	65911.1				2782.53
		pdeM	50688.9				4406.59
			24 hr. Normal			SE
			Rv	1.96444e+08		1.98034e+07
			ST100	1.77778e+08		3.67336e+07
			PDE	180000000		1.58908e+07
			pdeM	1.87111e+08		2.73175e+07
			24 hr. CHP
			Rv	65911.1		2782.53
			ST100	13377.8		1123.6
			PDE	13244.4		587.104
			pdeM	50688.9		4406.59
