# Supplementary material for: Mycobacterium tuberculosis PhoP integrates stress response to intracellular survival by regulating cAMP level
Source: eLife. 2024 May 13;13:RP92136. doi: 10.7554/eLife.92136 (PMC11090507; doi:10.7554/eLife.92136)
Supplement: Figure 4—source data 5. [file elife-92136-fig4-data5.xlsx]

## Sheet: Fig 4E
									% Colocalization of indicated mycobacterial strains in infection studies
			Rv	Rv0805	phoP mutant	Rv0805M
		Set1	22.4138	78.4615	68.5315	24.3671
		Set2	21.5686	69.2913	77.7778	21.2766
		Set3	27.551	77.4359	84.9558	18.3206
		Average	23.8445	75.0629	77.0883	21.3214
		Stdev	2.64353	4.10255	6.72289	2.46867
		SE	1.32177	2.05128	3.36144	1.23433
		p value	8.96384e-05	0.000235049	0.000164987	0.372963
			Rv	Rv0805	phoP mutant	Rv0805M
			23.8445	75.0629	77.0883	21.3214
			1.32177	2.05128	3.36144	1.23433
		Rv	23.8445		1.32177
		phoP mutant	77.0883		3.36144
		Rv0805	75.0629		2.05128
		Rv0805M	21.3214		1.23433
