# Supplementary material for: Mycobacterium tuberculosis PhoP integrates stress response to intracellular survival by regulating cAMP level
Source: eLife. 2024 May 13;13:RP92136. doi: 10.7554/eLife.92136 (PMC11090507; doi:10.7554/eLife.92136)
Supplement: Figure 4—source data 6. [file elife-92136-fig4-data6.xlsx]

## Sheet: Raw set1
Set1			Rv	Average			St100	Average			Rvpde	Average		rvmpde			H37Rv-Rv0805	0.48103
			0.155736	0.204802			0.60374	0.522411			0.646573	0.48103		Pearson's correlation			ΔphoP H37Rv	0.522411
			0.261189				0.287826				0.354823			0.509939			WT H37Rv	0.204802
			0.08229				0.59349				0.695095			0.421278			H37Rv-Rv0805M	0.330956
			0.116274				0.737989				0.400085			0.129065
			0.585999				0.660821				0.416216			0.375327
			0.019024				0.604456				0.208663			0.372948
			0.023044				0.491671				0.589681			0.356729
			0.066181				0.711795				0.467346			0.312504
			0.089709				0.285169				0.50501			0.364381
			0.312537				0.313272				0.651468			0.218908
			-0.01485				0.666635				0.510031			0.249772
			0.096907				0.464921				0.54068			0.406854
			0.152604				0.458589				0.273076			0.119818
			0.24461				0.719611				0.377077			0.442303
			0.036009				0.60502				0.40854			0.520885
			0.34875				0.695524				0.110239			0.422443
			0.399441				0.398029				0.598481			0.26527
			0.129863				0.441293				0.186924			0.090372
			0.45785				0.278335				0.433781			0.48028
			0.459586				0.255786				0.511906			0.164558
			0.208324				0.512692				0.587769			0.746411
			0.40639				0.691632				0.638027			0.301672
			0.307442				0.431795				0.310128			0.585771
			0.134395				0.559548				0.468333			0.039927
			-0.110523				0.581886				0.48159			0.299871
			0.402638				0.697947				0.621884			0.3292
			0.089775				0.558537				0.458594			0.667647
			-0.1405				0.657816				0.554106			0.411028
			0.403547				0.462025				0.441931			-0.050169
			0.306665				0.483396				0.614069			0.280665
			-0.108964				0.234333				0.496576			0.197369
			0.553754				0.410852				0.544484			0.512025
			0.415696				0.625053				0.618647			0.482738
			0.203208				0.469623				0.633173			0.267211
			0.19997				0.585426							0.314195
			0.123592				0.299735							0.003405
			0.187407				0.589687							0.173819
			0.317749				0.368645							0.395365
			0.222894				0.232126							0.181257
			0.275619				0.301448							0.16481
			-0.035908				0.30973							0.234756
			0.192149				0.56689							0.708352
			0.280181				0.646068							0.60993
			-0.128681				0.484955							0.037292
			0.167739				0.761129							0.089719
			-0.085818				0.371858							0.270454
			0.181738				0.422648							0.109124
			0.110308				0.589423							0.230893
			-0.041937				0.311782							0.180354
			0.19199				0.590972							0.695334
			0.200036				0.570697							0.052684
			0.008262				0.775024							0.445112
			0.403929				0.680152							0.139696
			-0.019348				0.385582							0.481328
			0.28282				0.470477							0.457768
			0.126795				0.6646							0.601443
			0.177057				0.361778							0.431947
			0.267493				0.606974							0.288165
			0.320079				0.513893							0.15882
			0.234153				0.534126							0.090762
			0.191013				0.626313							0.442878
			0.039123				0.671703							0.212539
			0.630605				0.527736							0.13164
			0.366348				0.675207							0.542048
			0.247072				0.502726							0.442709
			-0.11786				0.529944							0.584854
			0.363115				0.610238							0.021873
			0.077071				0.651726							0.44974
			0.413169				0.51758							0.543811
			0.336705				0.634692							0.124577
			0.402948				0.496378							0.481265
			0.175665											0.083188
			0.373661											0.522862
			-0.075329											0.279728
			0.025561											0.37592
			0.53415											0.17773
			0.368671											0.472168
			0.271876											0.460655
			0.168441											0.281435
			0.141999											0.083443
			0.196048											0.133473
			0.254262											0.277004
			0.277103											0.376191
			0.456011											0.389309
			0.46736											0.858657
			0.484484											0.562022
			0.068226											0.383466
			0.557142											0.118316
			0.030848											0.022692
			0.333785											0.508315
			0.37482											0.105507
			-0.108859											0.336897
			0.160233											0.557613
			0.064016											0.430373
			0.182585											0.178202
			0.433692											0.42804
			0.023961											-0.016289
			0.315401											0.205227
			0.175152											0.341029
			0.209224											0.534119
			0.089501											0.646577
			0.245891											0.492972
			0.111983										ave	0.330956
			0.182163
			0.437595
			0.155265
			0.032672
			0.157132
			0.124575
			0.122297
			0.22876
			0.030181
			0.04275
			0.26843
			0.24504
			0.088033
			0.247286
			0.308974
			0.269989
			0.149902
			0.075231
			0.138022
			0.297855
			0.126935
			-0.042496
			0.40981
			0.374884
			0.389292
			0.251407
			0.078812
			0.141159
			-0.028252
			0.112095
			0.294327
			0.031143
			0.18013
			0.291077
			0.375063
			0.002247
			0.364293
			0.128028
			0.301932
			0.376155
			0.139535

## Sheet: Raw set2
	Set2		Rv					ST100		Average				Rvpde		Average		Pearson's correlation			H37Rv-Rv0805	0.511715
			-0.002592		Average			0.590666		0.502071				0.646573		0.511715		0.531464			ΔphoP H37Rv	0.502071
			0.127197		0.25255			0.469421						0.354823				0.463923			WT H37Rv	0.25255
			0.403177					0.571134						0.695095				0.433993			H37Rv-Rv0805M	0.387352
			0.199197					0.483881						0.400085				0.573028
			0.21299					0.463433						0.416216				0.230482
			0.185755					0.638286						0.208663				0.607077
			0.166222					0.510846						0.589681				0.415989
			0.211714					0.518603						0.467346				0.352283
			0.114925					0.417352						0.50501				0.523657
			0.209132					0.453926						0.651468				0.39005
			0.394596					0.568013						0.510031				0.259191
			0.201702					0.49675						0.54068				0.401619
			0.197129					0.515596						0.273076				0.624584
			0.169543					0.464771						0.377077				0.282547
			0.443855					0.368201						0.40854				0.067945
			0.117078					0.471261						0.110239				0.256492
			0.170963					0.531222						0.598481				0.26108
			0.043892					0.664263						0.186924				0.297934
			0.138433					0.352988						0.433781				0.339104
			0.245863					0.516276						0.511906				0.154083
			0.362707					0.527685						0.587769				0.503913
			0.099933					0.52006						0.638027				0.338208
			0.167375					0.535558						0.310128				0.01959
			0.070263					0.545075						0.468333				0.528833
			0.230021					0.448053						0.554106				0.486407
			0.235562					0.58323						0.441931				0.208962
			0.603897					0.574981						0.614069				0.520963
			0.023158					0.431238						0.496576				0.261143
			0.245958					0.540503						0.544484				0.209555
			0.383608					0.608377						0.618647				0.430029
			0.245794					0.618583						0.633173				0.165244
			0.360829					0.617539						0.485336				0.333666
			0.413758					0.35067						0.497697				0.345393
			0.165171					0.588698						0.658621				0.749032
			0.285839					0.419545						0.399187				0.541832
			0.34279					0.675038						0.60925				0.240299
			0.190926					0.507279						0.536816				0.33679
			0.109428					0.543739						0.556659				0.464758
			0.10673					0.528928						0.468449				0.500055
			0.436813					0.470451						0.669641				0.586666
			0.241269					0.411487						0.669761				0.458133
			0.337442					0.412902						0.54464				0.204994
			0.213232					0.486715						0.57377				-0.029784
			0.115693					0.362925						0.65299				0.154821
			0.374278					0.664486						0.46485				0.396257
			0.049206					0.469366						0.506985				0.299518
			0.200695					0.537536						0.474666				0.29703
			0.292172					0.448085						0.805933				0.308768
			0.147799					0.457029						0.746956				0.495772
			0.332475					0.520174						0.409189				0.438798
			0.236219					0.392615						0.573141				0.132085
			0.303482					0.367057										0.221836
			0.571745					0.501659										0.220446
			0.321627					0.704888										0.743533
			0.205379					0.595568										0.456115
			0.283911					0.506634										0.379283
			0.067452					0.402256										0.4131
			0.447885					0.424305										0.419817
			0.22426					0.484051										0.535731
			0.526491					0.553724										0.340098
			0.028713					0.570316										0.358303
			0.423076					0.425598										0.388402
			0.43919					0.627318										0.335178
			0.30191					0.443376										0.459744
			0.526867					0.363003										0.261149
			0.445061					0.464986										0.277787
			0.043973					0.456309										0.181053
			0.377492					0.606621										0.521412
			0.286926					0.540607										0.417796
			0.127114					0.712018										0.444392
			0.255353					0.530784										0.712379
			0.24395					0.578952										0.10849
			0.424043					0.518522										0.397615
			0.157644					0.529808										0.524731
			0.348165					0.4894										0.372064
			0.24712					0.505097										0.330725
			0.205638					0.629646										0.242593
			0.434479					0.394408										0.487494
			0.103967					0.467746										0.418601
			0.346007					0.493175										0.522576
			0.171781					0.603555										0.278855
			0.2678					0.571766										0.266076
			0.136741					0.571										0.305609
			0.079538					0.443874										0.265531
			0.187465					0.455656										0.401533
			0.084296					0.598278										0.282824
			0.301983					0.481968										0.504679
			0.578198					0.359332										0.160173
			0.282279					0.514947										0.193835
			0.356663					0.399169										0.230223
			0.32952					0.601817										0.254373
			0.36135					0.422468										0.3462
			0.267783					0.418133										0.377178
			0.16142					0.463374										0.505047
			0.361581					0.477033										0.174063
			0.388324					0.429884										0.474739
			0.176923					0.372998										0.368025
			0.23459					0.441511										0.535631
			-0.181414					0.387414										0.414086
			0.350567					0.563751										0.391363
			0.033627					0.373195										0.562657
			0.238761					0.481172										0.059482
			0.25372					0.389742										0.547546
			0.140357					0.6401										0.572037
			0.325607															0.458987
			0.325014															0.450101
			0.24487															-0.002194
			0.392528															0.188436
			0.119574															0.310747
			0.372559															0.300236
			0.174284															0.423772
			0.200726															0.416673
			0.36701															0.448088
			0.281032															0.335791
			0.149518															0.535041
			0.076861															0.618018
			0.341119															0.574138
			0.277253															0.581596
			0.234134															0.595903
			0.41044															0.295649
			0.138101															0.442378
			0.06194															0.173486
			0.215636															0.317187
			0.196169															0.136937
			0.474476															0.455307
			0.356059															0.375732
			0.484329															0.426489
																		0.735616
																		0.688777
																		0.360406
																		0.029225
																		0.532731
																		0.326403
																		0.710561
																		0.462172
																		0.744502
																		0.66604
																		0.326116
																		0.477735
																		0.608168
																		0.515968
																		0.434001
																		0.254701
																		0.391586
																		0.479069
																		0.137413
																		0.661681
																		0.18494
																		0.503096
																		0.570083
																		0.438476
																		0.318241
																		0.490111
																		0.387367
																		0.736871
																		0.073088
																		0.671746
																	ave	0.387352

## Sheet: Raw set3
								Pearson's correlation coefficient of indicated strains in infection studies
	set3		Rv			st100			pde			mpde
			Pearson's correlation			Pearson's correlation			Pearson's correlation			Pearson's correlation					set3	set2	set1	ave	stdev	se
			0.609264			0.505302			0.685808			0.128051				WT H37Rv	0.236078	0.25255	0.204802	0.231143	0.0198029	0.00990144
			0.243198			0.546843			0.731707			0.370681				ΔphoP H37Rv	0.584201	0.502071	0.522411	0.536228	0.0349238	0.0174619
			0.48057			0.431516			0.689455			0.285982				H37Rv-Rv0805	0.612577	0.511715	0.48103	0.535107	0.0561934	0.0280967
			0.129675			0.573843			0.62222			0.20599				H37Rv-Rv0805M	0.265061	0.387352	0.330956	0.32779	0.0499751	0.0249875
			0.260854			0.420108			0.747461			-0.023969
			0.350587			0.555666			0.708222			0.225276					Pearson's correlation		p-value
			0.387414			0.534434			0.236735			0.199529				WT H37Rv	0.231143		0.00132646	0.025275
			0.324183			0.465831			0.715699			0.238182				ΔphoP H37Rv	0.536228		0.000668726
			0.327959			0.623789			0.668669			0.100539				H37Rv-Rv0805	0.535107
			0.250983			0.744135			0.56932			0.352374				H37Rv-Rv0805M	0.32779
			0.353671			0.299483			0.831664			0.15278
			0.133011			0.724351			0.658231			0.04704
			0.237294			0.578357			0.656459			0.26173
			0.474791			0.567921			0.536925			0.386659
			0.299779			0.464783			0.721498			0.35536
			0.138676			0.53179			0.861344			0.344863
			0.176696			0.54244			0.575002			0.097962
			0.231957			0.576825			0.271593			0.519899
			0.26448			0.483287			0.708098			0.387798
			0.398691			0.393938			0.686317			0.087862
			0.229684			0.484132			0.707047			0.436237
			0.183913			0.687216			0.598159			-0.052849
			0.288055			0.414419			0.34186			0.436898
			0.421412			0.501468			0.726726			0.481517
			0.439404			0.490384			0.326735			0.463127
			0.263863			0.567776			0.806849			0.130272
			0.142628			0.578159			0.762285			0.186237
			0.189848			0.666983			0.596654			0.381425
			0.205589			0.447678			0.788738			0.135918
			0.262819			0.622907			0.698722			0.150711
			0.2642			0.414915			0.352011			0.107255
			0.432423			0.648281			0.736674			-0.101408
			0.241523			0.506106			0.599286			0.020053
			0.27517			0.529579			0.785705			0.333336
			0.296773			0.470269			0.646024			-0.039017
			0.124031			0.409751			0.470791			0.399813
			0.280287			0.534189			0.468872			0.375821
			0.304569			0.653829			0.711149			0.31325
			0.155357			0.717301			0.27733			0.271436
			0.257403			0.645619			0.658851			0.203507
			0.227118			0.639458			0.759523			0.053837
			0.219973			0.612316			0.148298			0.457683
			0.084931			0.690769			0.733936			0.062039
			0.19161			0.792942			0.490169			0.526138
			0.032422			0.709402			0.802388			0.174616
			0.213964			0.66883			0.864075			0.192817
			0.030857			0.614794			0.830212			-0.030214
			0.189188			0.601537			0.564793			0.144651
			0.267785			0.65036			0.579947			0.515103
			0.236767			0.66277			0.68614			-0.062909
			0.263634			0.52766			0.70473			-0.039017
			0.042237			0.653977			0.495156			0.399813
			0.090285			0.533312			0.649702			0.375821
			0.262416			0.552859			0.722844			0.31325
			0.096856			0.56223			0.567686			0.271436
			0.361397			0.498087			0.786294			0.203507
			0.259501			0.657551			0.658298			0.053837
			0.075252			0.499395			0.693305			0.457683
			0.022114			0.425529			0.766499			0.062039
			0.202986			0.608158			0.775102			0.526138
			0.270695			0.645777			0.632649			0.174616
			0.208848			0.687186			0.699371			0.192817
			0.251656			0.549036			0.647879			-0.030214
			0.249934			0.592874			0.747903			0.144651
			0.195182			0.669858			0.627228			0.515103
			0.154087			0.73704			0.599087			-0.062909
			0.246134			0.515438			0.578488			0.227995
			0.353148			0.519295			0.55004			0.384302
			0.202856			0.526433			0.654673			0.060981
			0.015814			0.45048			0.522576			0.016669
			-0.011093			0.653833			0.476626			0.059367
			0.18057			0.740972			0.304924			-0.001946
			0.198929			0.61642			0.379514			0.108994
			0.107201			0.569514			0.29671			0.289418
			0.285165			0.479686			0.597823			0.119012
			0.245977			0.546978			0.601956			-0.051344
			0.318941			0.496427			0.516335			0.069067
		avg	0.236078			0.653471			0.785629			0.199976
						0.651124			0.736416			0.584829
						0.660405			0.662111			0.232282
						0.731904			0.56614			0.45835
						0.723238			0.527644			0.060659
						0.692195			0.564933			0.239668
						0.690546			0.444269			0.193831
						0.519944			0.645026			0.557277
						0.605963			0.54987			0.189492
						0.719485			0.560566			0.67246
						0.836579			0.357641			0.354665
						0.735815			0.705366			0.534158
						0.579869			0.677312			0.083855
						0.509841			0.59225			0.364142
						0.646312			0.712208			0.339533
						0.583394			0.350661			0.621687
						0.533787			0.641492			0.507723
						0.660907			0.490607			0.39569
						0.528485			0.775034			0.235335
						0.689456			0.413304			0.14335
					ave	0.584201			0.669766			0.405162
									0.736567			0.375752
									0.595003			0.395609
									0.440281			0.51414
									0.455505			0.160245
									0.556485			0.258778
									0.547376			0.129815
									0.708931			-0.066768
									0.631766			0.203165
									0.781951			0.240405
									0.345656			0.484226
									0.637927			0.398282
									0.737722			0.395141
									0.776873			0.270497
									0.663942			0.318181
									0.52117			0.338937
								ave	0.612577			0.335948
												0.455935
												0.409632
												0.304431
												0.279826
												0.312393
												0.579884
												0.305748
												0.122259
												0.323145
												0.224969
												0.55213
												0.118368
												0.166707
												0.424194
												0.086473
												0.334595
												0.29349
												0.484664
												0.159783
												0.39608
												0.815717
												0.351713
												0.440427
												0.038392
												0.556771
												0.40952
												0.419233
												0.254913
												0.319669
												0.220786
												0.539104
												0.008352
												0.011861
												0.148428
												0.218538
												0.490648
											avg	0.265061
