# Supplementary material for: Mycobacterium tuberculosis PhoP integrates stress response to intracellular survival by regulating cAMP level
Source: eLife. 2024 May 13;13:RP92136. doi: 10.7554/eLife.92136 (PMC11090507; doi:10.7554/eLife.92136)
Supplement: Figure 5—source data 1. [file elife-92136-fig5-data1.xlsx]

## Sheet: Figure 5-Source data 1
						CFU of indicated mycobacterial strains in mice lung (Lung burden)
		Rv	PhoPR	Rv-0805	Rv-0805M
		3503333	16633.3	13166.7	557845
		3100000	15966.7	15733.3	349661
		3296667	11900	23066.7	586433
		3196667	15700	11966.7	549781
		4520000	15366.7	5100	1033589
		1313333	10066.7	16700	436160
		TTEST	2.30986e-05	2.31022e-05	0.000150311
