# Supplementary material for: Mycobacterium tuberculosis PhoP integrates stress response to intracellular survival by regulating cAMP level
Source: eLife. 2024 May 13;13:RP92136. doi: 10.7554/eLife.92136 (PMC11090507; doi:10.7554/eLife.92136)
Supplement: Figure 5—source data 2. [file elife-92136-fig5-data2.xlsx]

## Sheet: Sheet1
							CFU of mycobacterial strains in mice spleen (Spleen burden)
			Rv	PhoPR	Rv-0805	Rv-0805M
			38000	2766.67	1200	2966.67
			40333.3	9100	466.667	18700
			67333.3	2600	6500	14400
			84333.3	533.333	300	20600
			98000	66.6667	3700	19666.7
			79000	7933.33	66.6667	12533.3
		TTEST		8.11186e-05	6.11974e-05	0.00129603
